# Supplementary material for: Controlling the thermoelectric properties of organo-metallic coordination polymers through backbone geometry
Source: Faraday Discuss. 2023 Sep 7;250:377–89. doi: 10.1039/d3fd00139c (PMC10926974; doi:10.1039/d3fd00139c)
Supplement: FD-250-D3FD00139C-s002 [file FD-250-D3FD00139C-s002.pdf]

## Supplementary Information

### Controlling the thermoelectric properties of organo-metallic coordination polymers through backbone geometry

*Zilu Liu, Md Azimul Haque, Chris N. Savory, Tianjun Liu, Satoru Matsuishi, Oliver Fenwick, David O. Scanlon, Martijn A. Zwijnenburg, Derya Baran \* and Bob C. Schroeder \**

Email: [derya.baran@kaust.edu.sa](mailto:derya.baran@kaust.edu.sa) ; [b.c.schroeder@ucl.ac.uk](mailto:b.c.schroeder@ucl.ac.uk)

#### Table of Contents

|                                                                            |    |
|----------------------------------------------------------------------------|----|
| General Experimental .....                                                 | 2  |
| Synthetic procedures .....                                                 | 3  |
| 1,2,3,4-Tetrakis(isopropylthio)benzene (iTIB) .....                        | 3  |
| Poly[nickel-benzene-1,2,3,4-tetrakis(thiolate)] (Ni-ibtt) .....            | 3  |
| 1,2,3,4-tetrakis(methylthio)benzene (1) .....                              | 3  |
| Intermediate compositions Ni(ibtt) <sub>x</sub> (btt) <sub>1-x</sub> ..... | 4  |
| X-ray photoelectron spectroscopy.....                                      | 7  |
| X-ray fluorescence analysis.....                                           | 9  |
| Fourier transform infrared and Raman spectroscopy .....                    | 10 |
| Powder X-ray diffraction .....                                             | 13 |
| Thermogravimetric analysis.....                                            | 13 |
| Electron paramagnetic resonance .....                                      | 14 |
| Density functional theory .....                                            | 16 |
| Thermoelectric characterisation.....                                       | 19 |
| References .....                                                           | 20 |

## General Experimental

All reagents and solvents were obtained from commercial suppliers and used without further purification. Reactions were carried out under nitrogen atmosphere using standard Schlenck techniques and reported yields refer to purified and spectroscopically pure compounds, unless otherwise stated. Concentration under reduced pressure was performed by rotary evaporation (25 - 40 °C) at an appropriate pressure. Thin layer chromatography (TLC) was performed using Merck Si60 F254 pre-coated TLC aluminium plates and flash column chromatography was performed using Merck Geduran Si 60 silica gel (40–63 µm particle size).  $^1\text{H}$  and  $^{13}\text{C}$  nuclear magnetic resonance (NMR) spectra were recorded on a Bruker NMR spectrometer *Avance III 400* at 298 K. Chemical shifts ( $\delta$ ) are reported in parts per million (ppm), using the residual solvent peaks as internal standard. For  $^1\text{H}$ -NMR ( $\delta$ ):  $\text{CDCl}_3$  7.26. For  $^{13}\text{C}$ -NMR ( $\delta$ ):  $\text{CDCl}_3$  77.16. Coupling constants ( $J$ ) are given in Hertz (Hz) and spin multiplicities denoted as follows: s = singlet, d = doublet, hept = heptet. Mass spectrometry data was collected on a *Thermo Accela LC/LTQ* (EI) and *Waters LCT Premier QTOF* (ESI).

*Bruker Platinum ATR* with a single reflection diamond attachment was used to record Fourier-transform infrared spectra (FTIR). *Renishaw inVia* Raman spectrometer equipped with a *Leica DM LM* microscope was used to perform the Raman spectroscopy at room temperature under ambient conditions. A 785 nm diode laser was chosen as the excitation source for all the samples with a maximum power of 500 mW. Thermal stabilities were examined by a *TA instruments Q500 TGA* under nitrogen atmosphere over a range of 293 K to 1073 K at a constant heating rate of 20 K min<sup>-1</sup>. Energy dispersive X-ray fluorescence (ED-XRF) data was collected by a *Malvern Panalytical Epsilon 4* spectrometer equipped with a silver anode X-ray tube. X-ray diffraction (XRD) was performed by a *STOE SEIFERT* diffractometer using  $\text{Mo K}_\alpha$  (0.7093 Å) radiation with a detected angular range of  $2^\circ < 2\theta < 40^\circ$  and a step size of  $0.05^\circ$  at 1 s per step. MDI Jada 6 software was used for the XRD data analysis. X-ray photoelectron spectroscopy (XPS) was performed by a *Thermo Scientific K-Alpha* spectrometer with a monochromated Aluminium (Al)  $\text{K}_\alpha$  X-ray source (1486.7 eV). All XPS data was processed with the CasaXPS software and calibrated against the C 1s peak to 284.6 eV. EPR spectra were measured at 77 K using an EMX X-band (~10 GHz) spectrometer (Bruker, Germany) with a cylindrical microwave resonator and a liquid nitrogen Dewar. The concentration of unpaired electron was estimated by comparing the area of observed absorption peak with that of  $\text{CuSO}_4 \times 5 \text{ H}_2\text{O}$  standard sample ( $\text{Cu}^{2+}$ , d9,  $S = 1/2$ ). DC magnetization measurements were performed using a MPMS3 magnetometer (Quantum Design, USA) for a temperature of 2-300 K and magnetic field of 0 - 7 T. Electrical conductivity and Seebeck measurements were performed on OMCP pellets. The pellets were prepared by grounding the OMCP samples into fine powder with mortar and pestle before compressing the powder into round-shaped pellets (12.5 mm diameter; thickness between 0.8 – 1.2 mm) using KBr pellet dies applying a pressure of around 2.6 GPa. The thermoelectric characterisation was conducted on a *Netzsch SBA 548 Nemesis* thermoelectric set up under Helium environment using a four-probe technique and dual Peltier configuration, respectively.

## Synthetic procedures

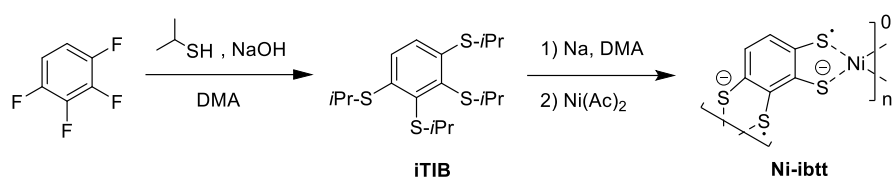

### 1,2,3,4-Tetrakis(isopropylthio)benzene (iTIB)

1,2,3,4-tetrafluorobenzene (0.9 g, 6 mmol) and sodium hydroxide (1.83 g, 45.7 mmol) were dissolved in 20 mL of anhydrous *N,N*-dimethylacetamide (DMA) under an inert atmosphere ( $\text{N}_2$ ), followed by the dropwise addition of 2-propanethiol (2.90 mL, 31.3 mmol) at room temperature. The solution was then refluxed at 100 °C for 2 h. Afterwards the solution was cooled to room temperature and 30 mL of brine was slowly added under stirring. The crude product was extracted with ethyl acetate (4 × 25 mL) and the combined organic layers filtered through a silica plug to remove residual DMA. After solvent evaporation, the product (iTIB) was recovered as a light-yellow oil (2.04 g, 91%).  $^1\text{H}$ -NMR (400 Hz,  $\text{CDCl}_3$ ,  $\delta$ ): 7.14 (s, 2H), 3.59 (hept,  $J=6.7$  Hz, 2H), 3.42 (hept,  $J=6.7$  Hz, 2H), 1.36 (d,  $J=6.7$  Hz, 12H), 1.22 (d,  $J=6.7$  Hz, 12H).  $^{13}\text{C}$ -NMR (100 Hz,  $\text{CDCl}_3$ ,  $\delta$ ): 141.7, 140.5, 127.2, 41.1, 36.6, 127.2, 23.2, 22.9. MS (EI): calcd. for  $\text{C}_{18}\text{H}_{31}\text{S}_4$   $[\text{M}+\text{H}]^+$  375.13, 376.13, 377.13; obs. 375.13, 376.13, 377.13.

### Poly[nickel-benzene-1,2,3,4-tetrakis(thiolate)] (Ni-ibtt)

iTiB (1.51 g, 4 mmol) was dissolved in anhydrous *N,N*-dimethylacetamide (75 mL) under inert atmosphere ( $\text{N}_2$ ). Sodium pieces (5.2 g, 226 mmol) were then added to the solution and heated to 100 °C for 24 hours. Afterwards 15 mL of degassed and deionised water were added dropwise into the reaction slurry to yield an orange-brown solution. Nickel acetate tetrahydrate (1.02 g, 4 mmol) dissolved in 20 mL of degassed water was added dropwise over 15 minutes, during which the solution gradually turned deep black in colour. The mixture was further heated at 100 °C for another 24 hours. The crude black solid was collected by centrifugation and further purified by Soxhlet extraction with deionized water for 24 h, followed by methanol for 24 hours. The purified Ni-ibtt was dried for 24 hours in vacuum at 100 °C and recovered as a black powder (0.75g, 72%).

### 1,2,3,4-tetrakis(methylthio)benzene (1)

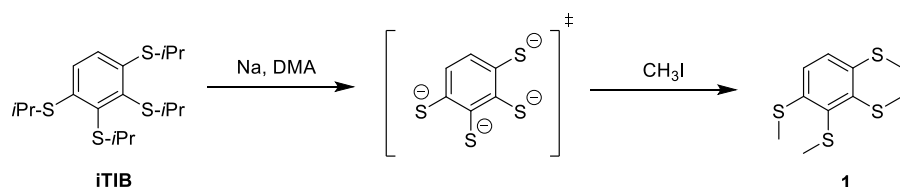

To verify that the intermediate formed after sodium reduction was indeed 1,2,3,4-benzenetetrakis(thiolate), iTiB (110 mg, 0.294 mmol) was dissolved in 5 mL of anhydrous *N,N*-dimethylacetamide. Sodium pieces (380 mg, 16.5 mmol) were then added to the solution and

heated to 100 °C for 24 hours. Afterwards, the reaction was cooled to room temperature and quenched by the addition of methyl iodide (250 mg, 1.76 mmol). The crude product was extracted with ethyl acetate, washed with water, and dried over MgSO<sub>4</sub>. After filtration, the organic solvent was removed, yielding 1,2,3,4-tetrakis(methyl)benzene **1** (63 mg, 0.24 mmol, 82%). <sup>1</sup>H-NMR (400 Hz, CDCl<sub>3</sub>, δ): 7.06(s, 2H), 2.43(s, 6H), 2.41(s, 6H). <sup>13</sup>C-NMR (100 Hz, CDCl<sub>3</sub>, δ): 142.3, 139.3, 124.7, 20.0, 16.3. HRMS (ESI): calcd. for C<sub>10</sub>H<sub>15</sub>S<sub>4</sub> [M+H]<sup>+</sup> 263.0057; obs. 263.0058.

#### **Intermediate compositions Ni(ibtt)<sub>x</sub>(btt)<sub>1-x</sub>**

Ni(ibtt)<sub>0.5</sub>(btt)<sub>0.5</sub> and Ni(ibtt)<sub>0.2</sub>(btt)<sub>0.8</sub> were prepared following the same procedure as outlined above for Ni-ibtt. The molar ratios of the respective organic ligand precursors 1,2,4,5-tetrakis(isopropylthio)benzene (TIB) and 1,2,3,4-tetrakis(isopropylthio)benzene (iTIB) were adjusted accordingly.

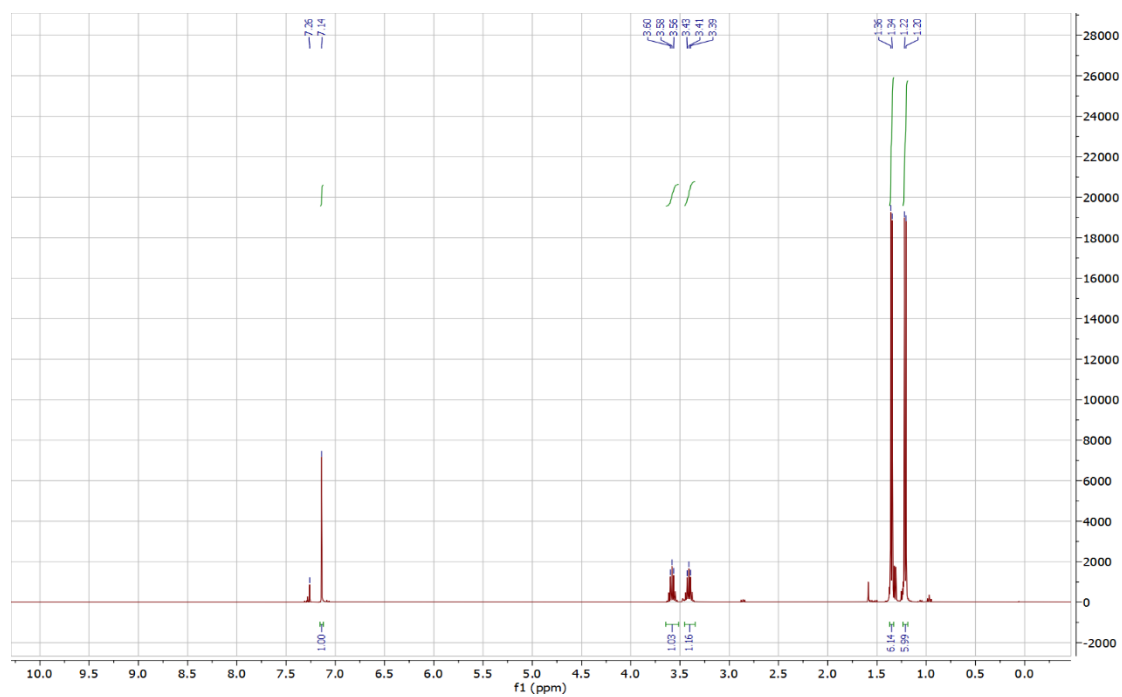

**Figure S1.** <sup>1</sup>H-NMR of iTIB.

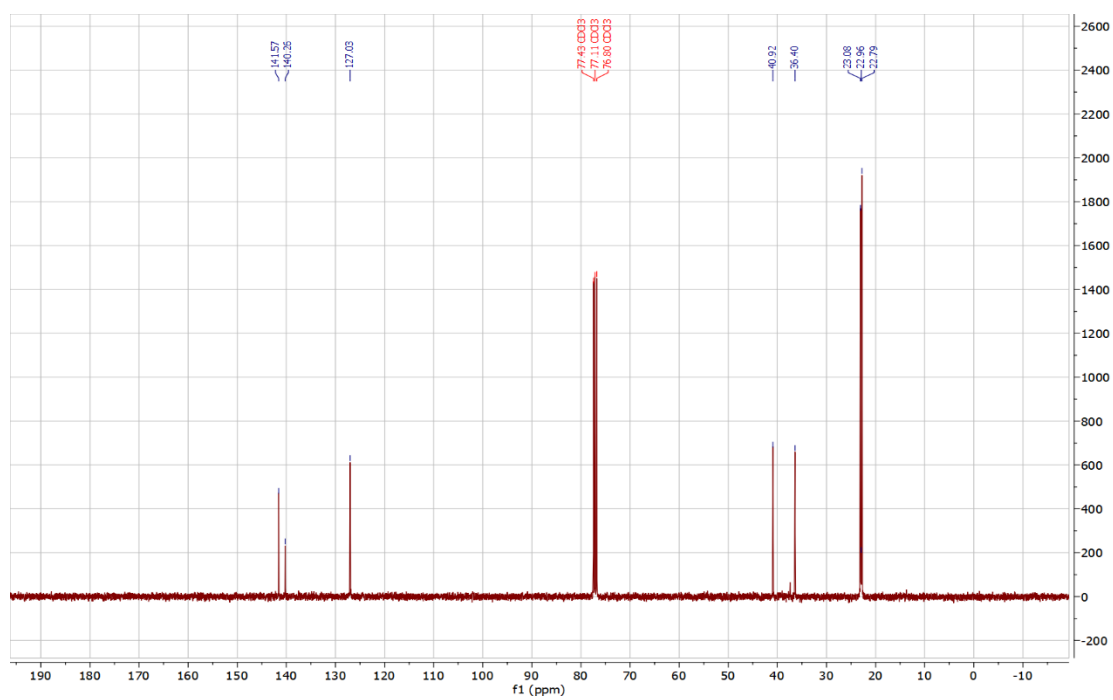

**Figure S2.** <sup>13</sup>C-NMR of iTIB.

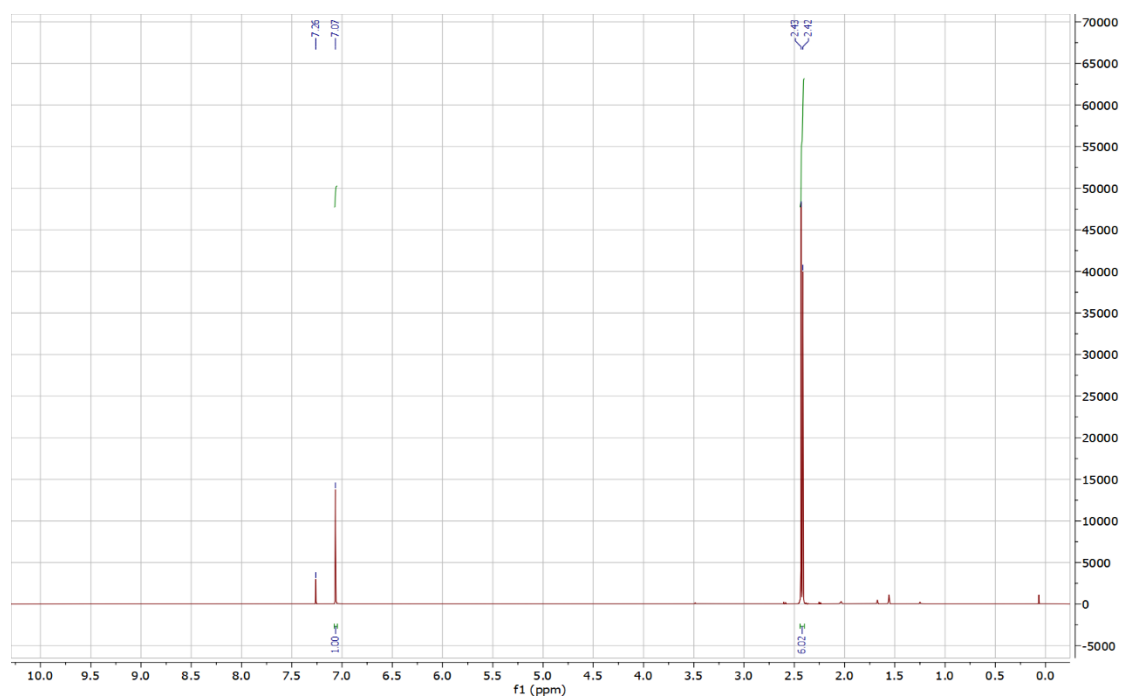

**Figure S3.** <sup>1</sup>H-NMR of compound **1**.

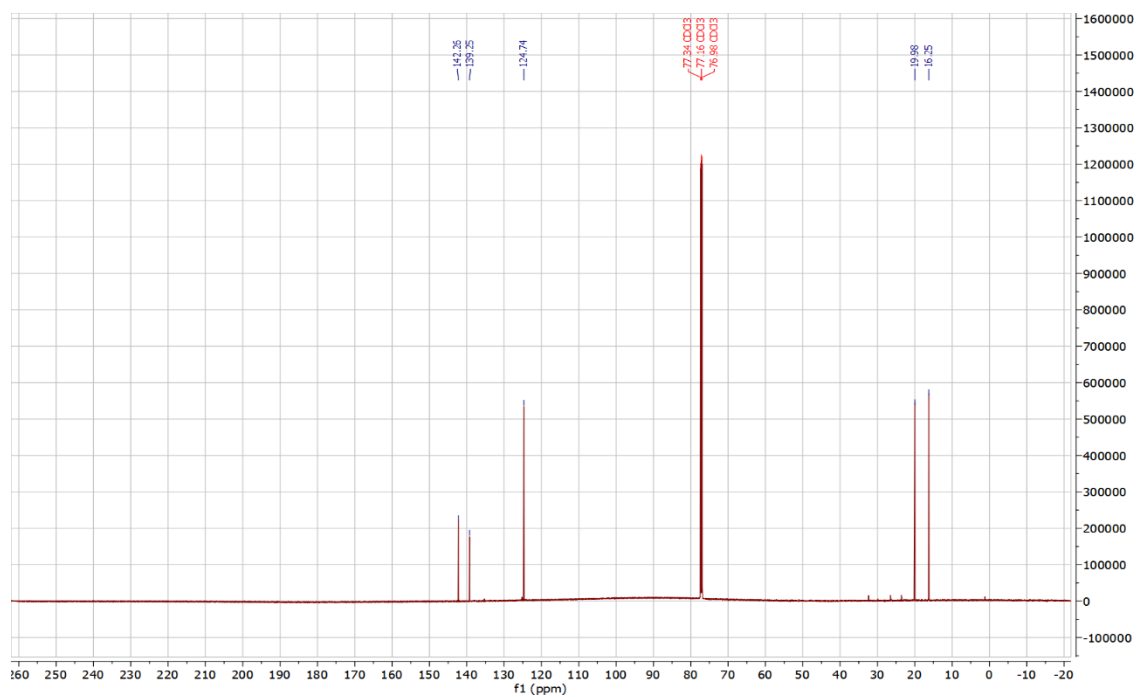

**Figure S4.** <sup>13</sup>C-NMR of compound **1**.

## X-ray photoelectron spectroscopy

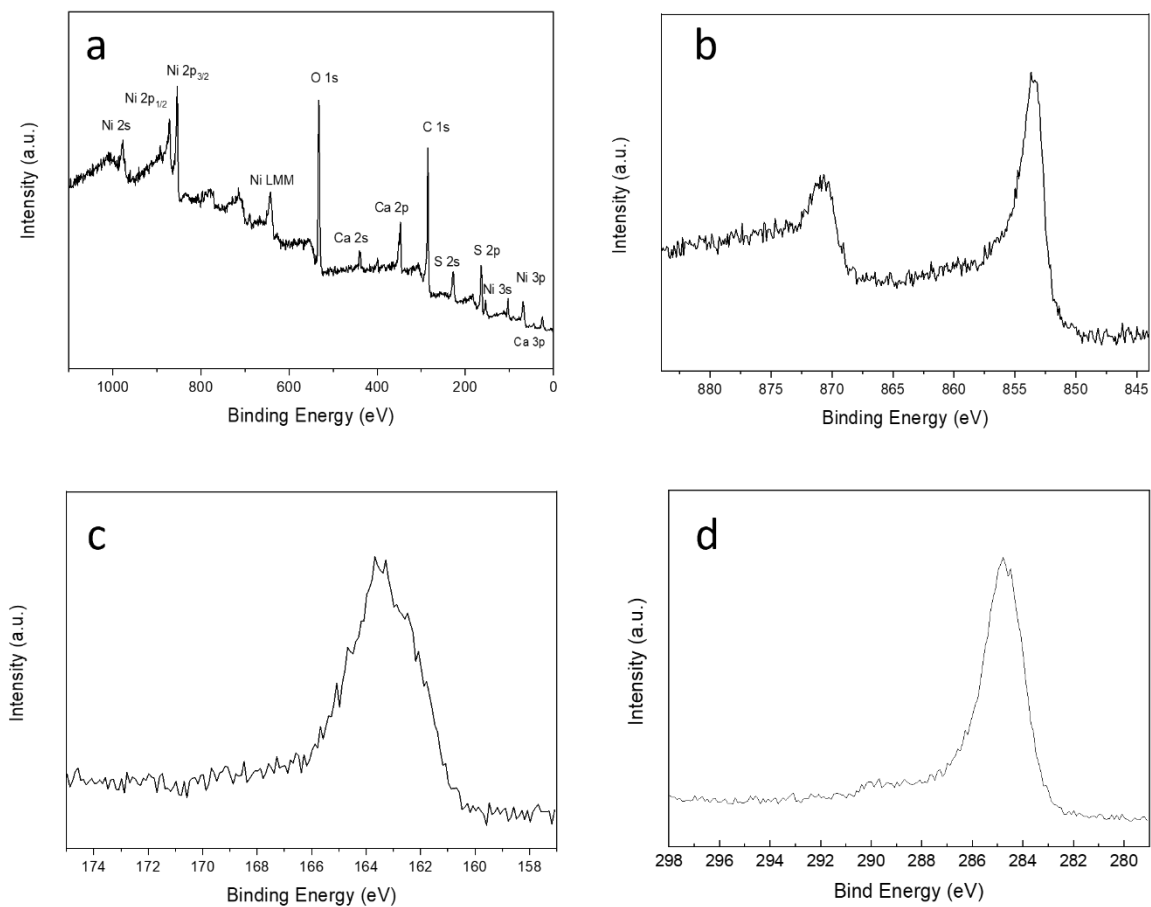

**Figure S5.** XPS spectra of  $\text{Ni}-(\text{ibtt})_{0.5}(\text{btt})_{0.5}$ , (a) survey scan, (b) Ni 2p, (c) S 2p and (d) C 1s.

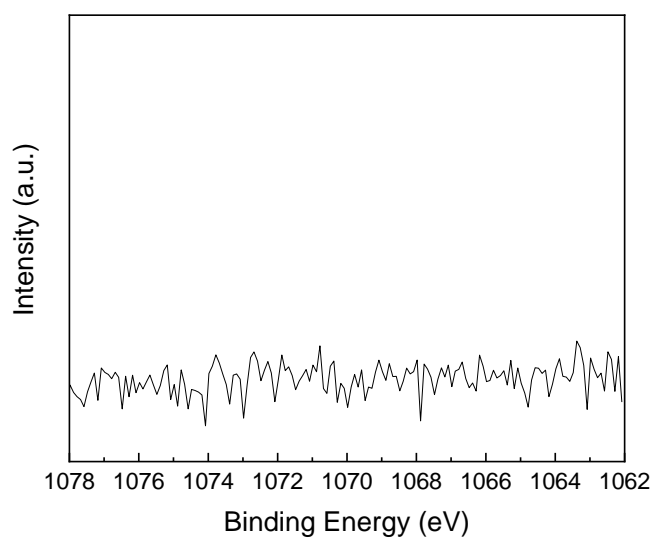

**Figure S6.** Na 1s core level XPS spectrum of  $\text{Ni}-(\text{ibtt})$ .

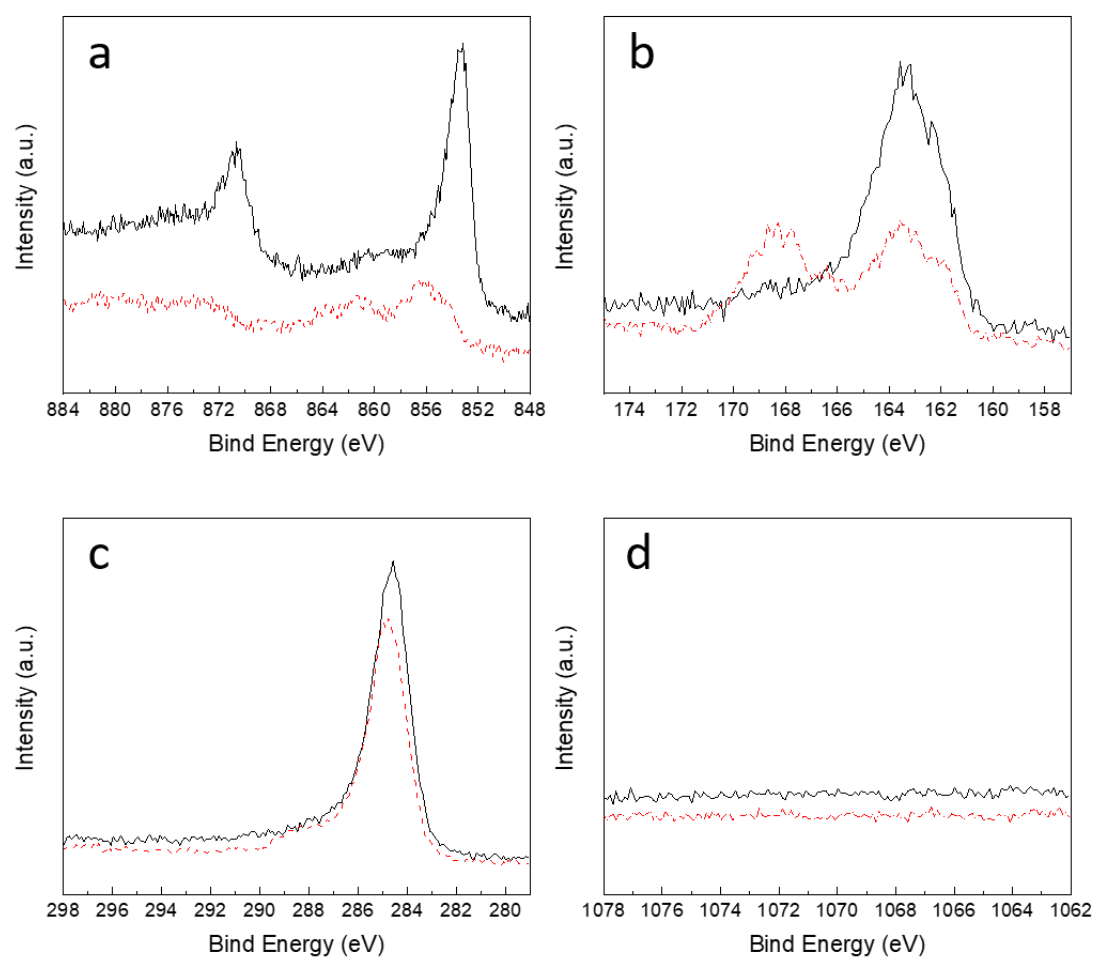

**Figure S7.** XPS spectra of the annealed pellet of Ni-ibtt on the surface (red dash) and 15 nm beneath (black solid): (a) Ni 2p, (b) S 2p, (c) C 1s and (d) Na 1s.

## X-ray fluorescence analysis

**Table S1:** X-ray fluorescence analysis (XRF) of Ni-ibtt, Ni-btt, Ni(ibtt)<sub>0.5</sub>(btt)<sub>0.5</sub> and Ni<sub>1</sub>(ibtt)<sub>0.2</sub>(btt)<sub>0.8</sub>.

| Ni-ibtt<br>S/Ni = 3.15 |           |          | Ni-btt<br>S/Ni = 3.31 |           |          | Ni <sub>1</sub> (ibtt) <sub>0.5</sub> (btt) <sub>0.5</sub><br>S/Ni = 3.61 |           |           | Ni <sub>1</sub> (ibtt) <sub>0.2</sub> (btt) <sub>0.8</sub><br>S/Ni = 3.00 |           |           |
|------------------------|-----------|----------|-----------------------|-----------|----------|---------------------------------------------------------------------------|-----------|-----------|---------------------------------------------------------------------------|-----------|-----------|
| Element                | wt%       | at%      | Element               | wt%       | at%      | Element                                                                   | wt%       | at%       | Element                                                                   | wt%       | at%       |
| S                      | 59.90%    | 74.80%   | S                     | 62.50%    | 74.30%   | S                                                                         | 63.50%    | 77.50%    | S                                                                         | 52.8 %    | 68.50%    |
| Ni                     | 34.80%    | 23.70%   | Ni                    | 34.50%    | 22.40%   | Ni                                                                        | 32.20%    | 21.50%    | Ni                                                                        | 32.20%    | 22.80%    |
| Si                     | 894.0 ppm | 0.13%    | Si                    | 0.85%     | 1.15%    | Mg                                                                        | 0.47%     | 0.76%     | Mg                                                                        | 0.96%     | 1.65%     |
| Cl                     | 1.13%     | 1.27%    | P                     | 1.01%     | 1.24%    | Si                                                                        | 686.3 ppm | 0.01%     | Si                                                                        | 2.70%     | 4.00%     |
| Ca                     | 2.99%     | 2.98%    | Ca                    | 0.61%     | 0.58%    | Ca                                                                        | 3.55%     | 3.5 ppm   | P                                                                         | 0.84%     | 1.13%     |
| Ti                     | 182.5 ppm | 153 ppm  | Ti                    | 57 ppm    | 45.4 ppm | Ti                                                                        | 25.2 ppm  | 20.6 ppm  | Ca                                                                        | 1.62%     | 1.69%     |
| Fe                     | 391 ppm   | 280 ppm  | Fe                    | 351.6 ppm | 240 ppm  | Fe                                                                        | 255.8 ppm | 179.4 ppm | Ti                                                                        | 96.7 ppm  | 84.1 ppm  |
| Zn                     | 237.3 ppm | 145 ppm  | Zn                    | 0.20%     | 0.12%    | Zn                                                                        | 0.18%     | 0.11%     | Fe                                                                        | 0.10%     | 767.8 ppm |
| As                     | 8 ppm     | 4.27 ppm | As                    | 11.8 ppm  | 6 ppm    | As                                                                        | 7.2 ppm   | 376.3 ppm | Zn                                                                        | 0.14%     | 872.2 ppm |
| Se                     | 2.7 ppm   | 1.4 ppm  | Se                    | 1.7 ppm   | 0.8 ppm  | Se                                                                        | 3.2 ppm   | 1.6 ppm   | As                                                                        | 11.3 ppm  | 6.3 ppm   |
| Br                     | 65.9 ppm  | 33 ppm   | Br                    | 679.4 ppm | 324 ppm  | Br                                                                        | 57.8 ppm  | 28.3 ppm  | Se                                                                        | 3.6 ppm   | 1.9 ppm   |
| Sr                     | 98.9 ppm  | 45.2 ppm | Sr                    | 6.4 ppm   | 2.8 ppm  | Sr                                                                        | 113.3 ppm | 50.6 ppm  | Br                                                                        | 6.6 ppm   | 3.4 ppm   |
| Zr                     | 14.9 ppm  | 6.5 ppm  | Sn                    | 138.8 ppm | 44.6 ppm | Zr                                                                        | 19.3 ppm  | 8.3 ppm   | Sr                                                                        | 19.3 ppm  | 9.2 ppm   |
| Sn                     | 162.2 ppm | 54.7 ppm | Sb                    | 164 ppm   | 51.4 ppm | Sn                                                                        | 104.3 ppm | 34.4 ppm  | Sn                                                                        | 203.8 ppm | 71.5 ppm  |
| Sb                     | 65.7 ppm  | 21.6 ppm | Te                    | 105.7 ppm | 31.6 ppm | Sb                                                                        | 35.7 ppm  | 11.5 ppm  | Sb                                                                        | 64.5 ppm  | 22.1 ppm  |
| Te                     | 140.8 ppm | 44.2 ppm | I                     | 661.9 ppm | 199 ppm  | Te                                                                        | 94.4 ppm  | 29 ppm    | Te                                                                        | 179.0 ppm | 58.4 ppm  |
| I                      | 132.5 ppm | 41.8 ppm | Ba                    | 30.4 ppm  | 8.5 ppm  | Pb                                                                        | 16.5 ppm  | 3.1 ppm   | Au                                                                        | 16.0 ppm  | 3.4 ppm   |
| Re                     | 0.5 ppm   | 0.1 ppm  | Er                    | 0.12%     | 274 ppm  |                                                                           |           |           | Pb                                                                        | 2.3 ppm   | 0.5 ppm   |
| Pb                     | 9.4 ppm   | 1.8 ppm  | Pb                    | 13.3 ppm  | 2.5 ppm  |                                                                           |           |           |                                                                           |           |           |

## Fourier transform infrared and Raman spectroscopy

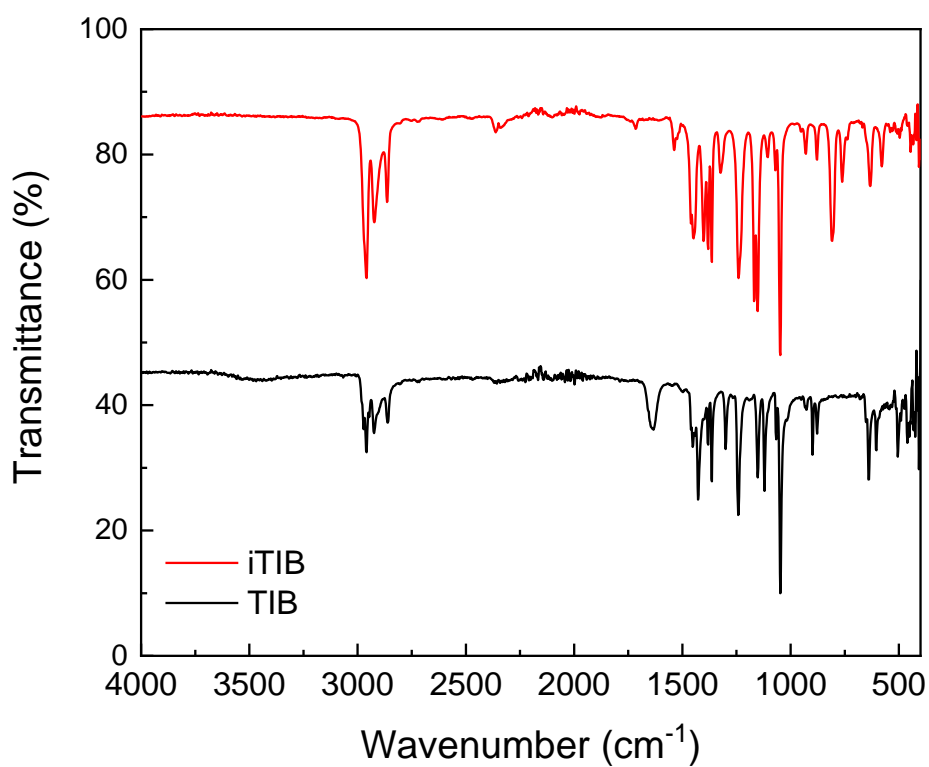

**Figure S8.** FTIR spectra of **TIB** and **iTIB**. The spectra have been stacked for clarity.

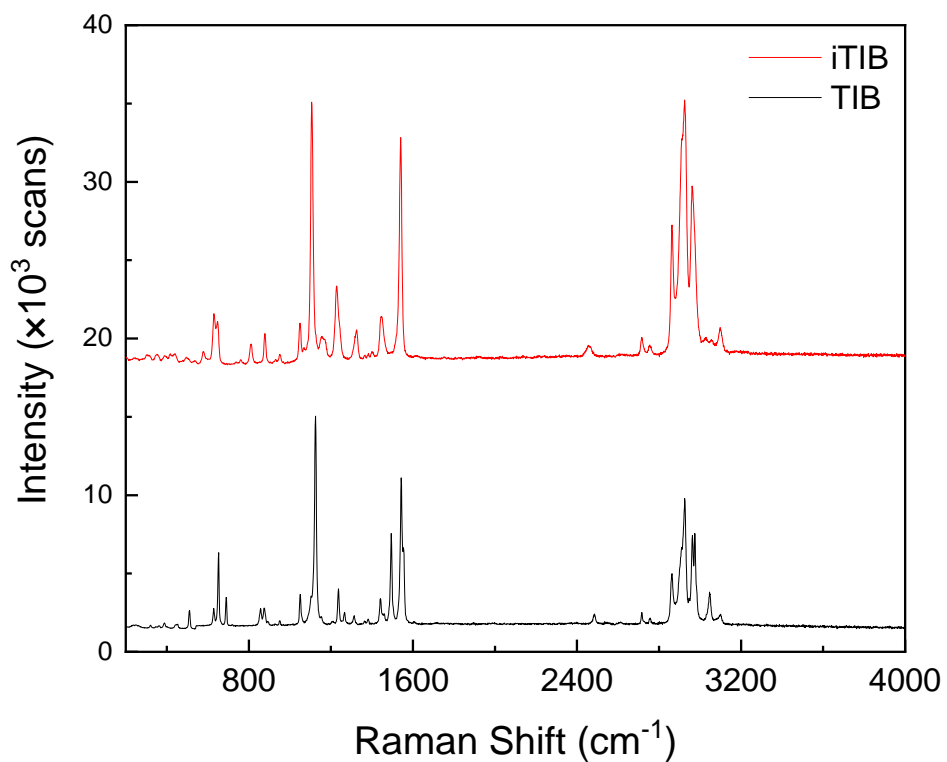

**Figure S9.** Resonance Raman (728 nm excitation) spectra of **TIB** and **iTIB**. The spectra have been stacked for clarity.

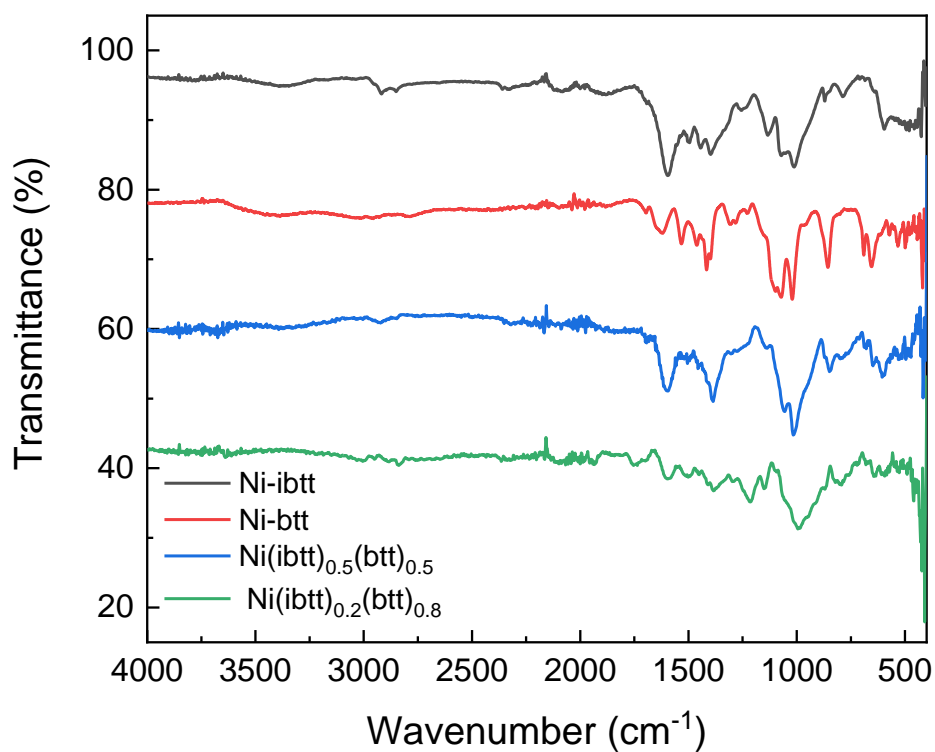

**Figure S10.** FTIR spectra of **Ni-btt**, **Ni-ibtt**, **Ni(ibtt)<sub>0.5</sub>(btt)<sub>0.5</sub>** and **Ni(ibtt)<sub>0.2</sub>(btt)<sub>0.8</sub>**. The spectra have been stacked for clarity.

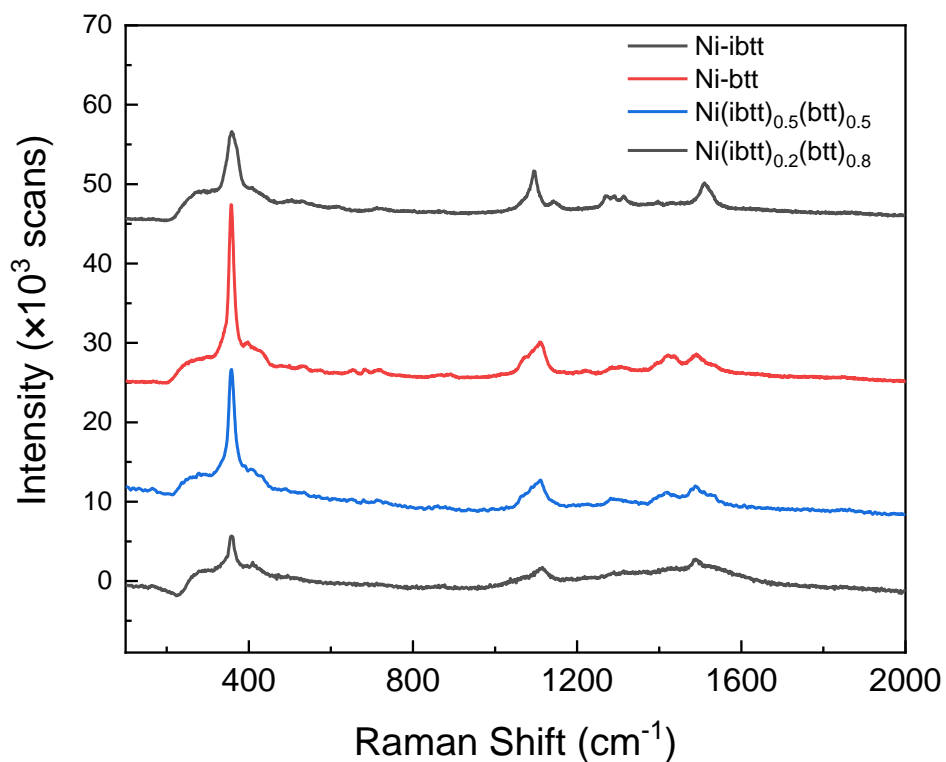

**Figure S11.** Resonance Raman (728 nm excitation) spectra of **Ni-btt**, **Ni-ibtt**, **Ni(ibtt)<sub>0.5</sub>(btt)<sub>0.5</sub>** and **Ni(ibtt)<sub>0.2</sub>(btt)<sub>0.8</sub>**. The spectra have been stacked for clarity.

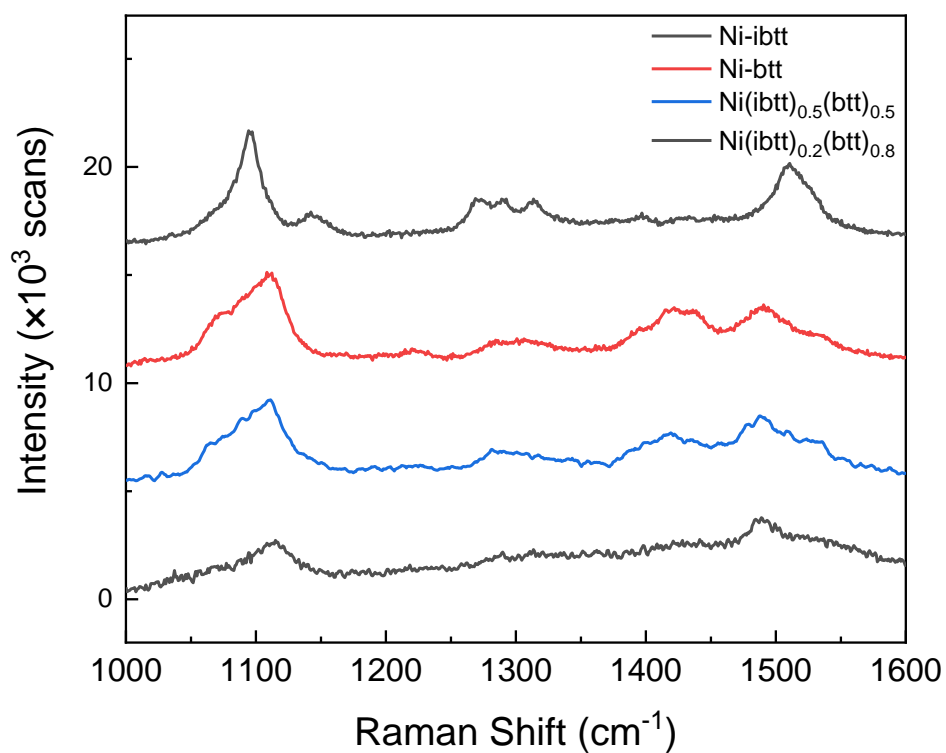

**Figure S12.** Resonance Raman (728 nm excitation) spectra of **Ni-btt**, **Ni-ibtt**, **Ni(ibtt)<sub>0.5</sub>(btt)<sub>0.5</sub>** and **Ni(ibtt)<sub>0.2</sub>(btt)<sub>0.8</sub>**. The spectra have been stacked for clarity.

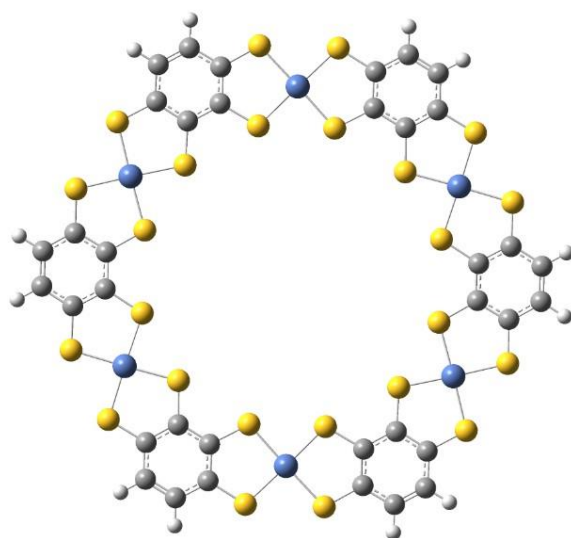

**Figure S13.** Minimum energy conformation obtained from DFT calculations (B3LYP/def2-SVP) for hexamers of **Ni-ibtt** with all metal-ligand complexes in the *cis*-configuration.

### Powder X-ray diffraction

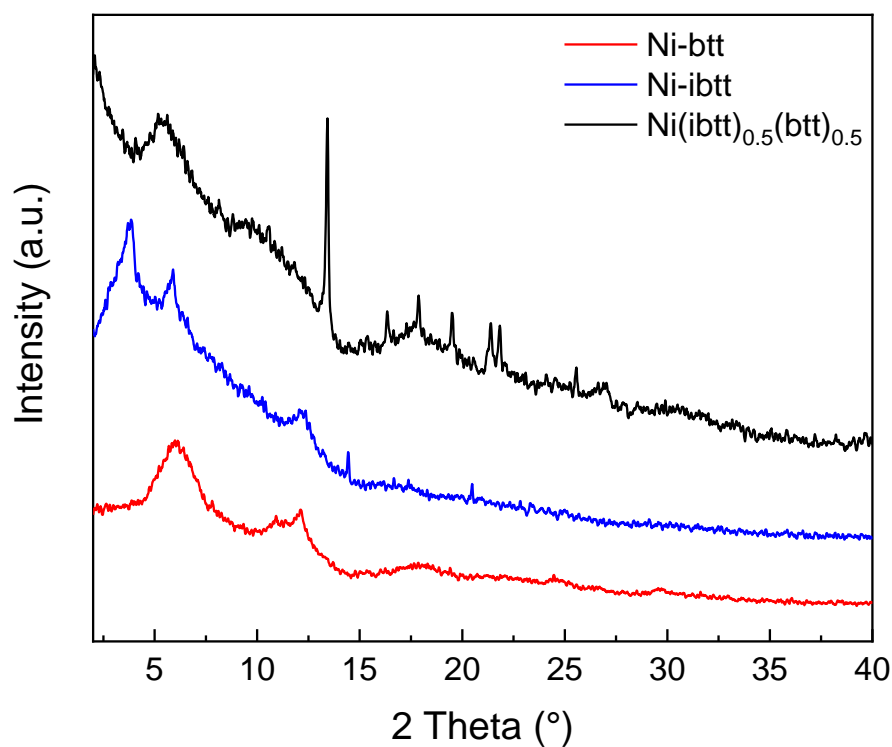

**Figure S14.** Powder x-ray diffractograms of **Ni-btt**, **Ni-ibtt** and **Ni(ibtt)<sub>0.5</sub>(btt)<sub>0.5</sub>**. The spectra have been stacked for clarity.

### Thermogravimetric analysis

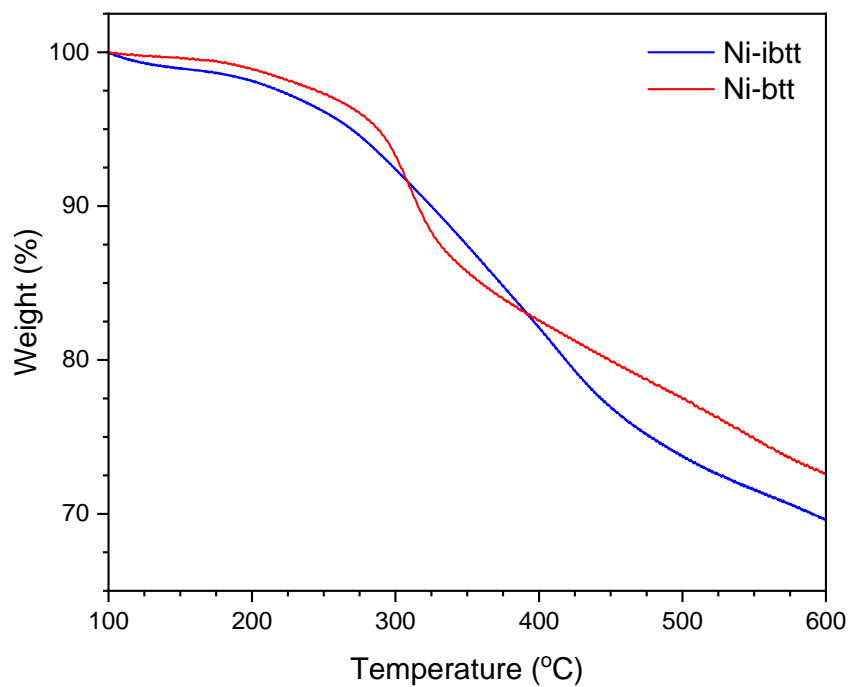

**Figure S15.** Thermogravimetric analysis data of **Ni-btt**, **Ni-ibtt**.

## Electron paramagnetic resonance

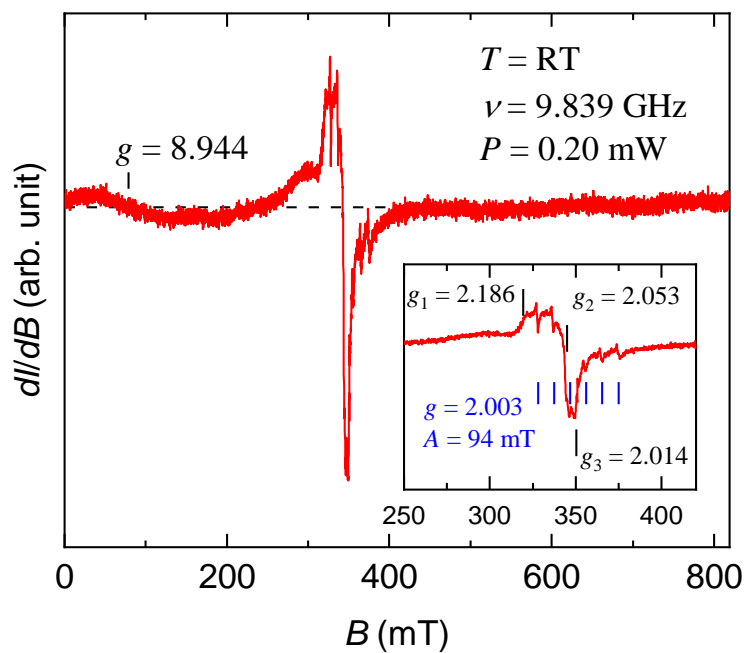

**Figure S16.** First derivative EPR spectra of **Ni-ibtt** recorded at 77 K.

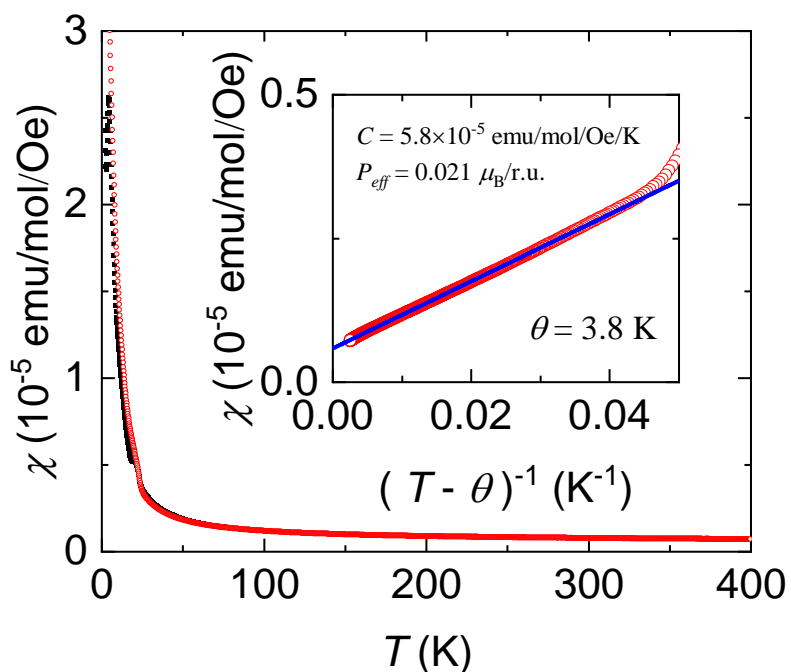

**Figure S17.** Temperature dependence of magnetic susceptibility ( $\chi_m$ ) of **Ni-ibtt** measured by SQUID.

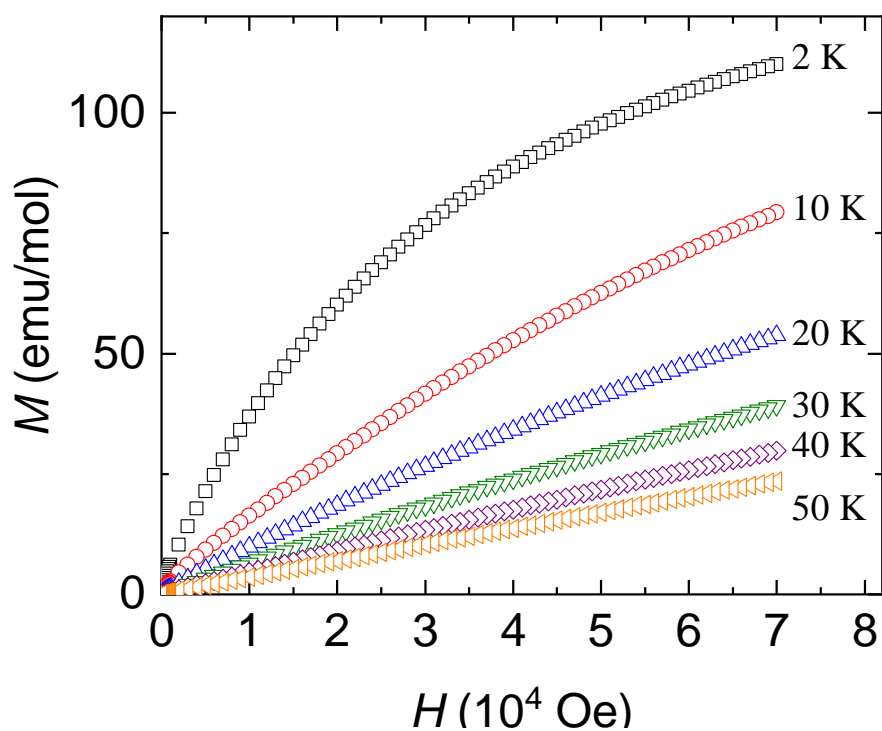

**Figure S18.** Magnetization of **Ni-ibtt** as a function of the applied magnetic field at selected temperatures.

**Table S2.** Summary of the EPR parameters for **Ni-ibtt**.  $\mu_B$  is the Bohr magneton. r.u. is the repeat unit of the OMCP.

| SVSM                                            |                                | EPR                           |                                                                                                                                                                  |
|-------------------------------------------------|--------------------------------|-------------------------------|------------------------------------------------------------------------------------------------------------------------------------------------------------------|
| $\rho_{\text{eff}}$<br>( $\mu_B/\text{r. u.}$ ) | $N_{\text{spin}}$<br>(/r. u.)* | $N_{\text{spin}}$<br>(/r. u.) |                                                                                                                                                                  |
| 0.021                                           | 0.012                          | 0.031 (central field)         | $g_1 = 2.186, g_2 = 2.053, g_3 = 2.014$<br>Ni <sup>3+</sup> LS ( $d^7, S = 1/2$ )<br>$g \sim 2.003, A = 94 \text{ mT}$<br>Mn <sup>2+</sup> HS ( $d^5, S = 5/2$ ) |
|                                                 |                                | 0.021 (low field)             | $g \sim 8.9$<br>Ni <sup>2+</sup> HS ( $d^8, S = 1$ )                                                                                                             |

## Density functional theory

Cluster Density Functional Theory (DFT) calculations we performed on oligomeric cluster models of the Ni-btt and 100%-trans Ni-ibtt coordination polymers. These models consisted of four nickel ions bridged by three benzene-1,2,4,5-tetrathiolate or benzene-1,2,3,4-tetrathiolate ligands, respectively, and capped with terminal benzene-1,2-dithiolate capping ligands, see Fig. S19, while we also performed calculations on their octamer equivalents with eight nickel atoms and nine ligands, see Fig. 4 in the main text. The octamer calculations were performed to get a general idea of the shape of the polymers and the tetramer oligomers were used for a full exploration of possible electronic states of the materials. The cluster calculations used a combination of the B3LYP hybrid functional,<sup>1-4</sup> incorporating 20% Hartree-Fock exchange, the Grimme's D3 dispersion correction<sup>5</sup> and the def2-SVP basis-set<sup>6</sup> and were performed using Turbomole 7.5.<sup>7, 8</sup> Multiple spin-states were explored for each oligomer while also calculations on cationic and anionic versions of the oligomers were performed to calculate the oligomers ionisation potential and electron affinity.

Periodic DFT calculations were performed on periodic models of the Ni-btt and 100%-trans Ni-ibtt coordination polymers using the Vienna Ab Initio Simulation Package (VASP).<sup>9-12</sup> These calculations use the projector augmented wave method, with scalar-relativistic pseudopotentials and 3p electrons included in the valence shell for Ni.<sup>13</sup> In line with our previous study on Ni coordination polymers,<sup>14</sup> the hybrid functional HSE06, incorporating 25% Hartree-Fock exchange and a screening parameter of 0.11 bohr<sup>-1</sup> was used to describe the exchange-correlation interactions.<sup>15, 16</sup> The periodic models of the coordination polymers were constructed based the central part of the oligomeric models and consist of a single chain in one dimension (along c for Ni-btt, and a for Ni-ibtt), with a cell size of 30 Å in the other two dimensions to prevent interaction between periodic images. A plane wave energy cutoff of 600 eV and k-point meshes of 1 × 1 × 4 and 2 × 1 × 1 respectively were sufficient to converge the total energy of each polymer to within 1 meV per atom. Multiple initial spin states were trialled for each polymer, and the structures allowed to relax until the forces on each atom were below 0.01 eV Å<sup>-3</sup>. The sumo package was used for plotting the electronic band structures,<sup>17</sup> with the high-symmetry path through the Brillouin zone taken from Bradley and Cracknell.<sup>18</sup> Curvature effective masses were obtained using a five-point parabolic fit to the band edges using the effmass package, and Kane dispersion parameters were calculated to assess non-parabolicity.<sup>19</sup>

**Table S3.** (S)HOMO and (S)LUMO energies and -IP and -EA values predicted for the oligomeric models of **Ni-ibtt** and **Ni-btt** (B3LYP/def2-SVP).

|                | (S)HOMO | (S)LUMO | -IP   | -EA   |
|----------------|---------|---------|-------|-------|
| <b>Ni-ibtt</b> | -5.82   | -4.50   | -6.47 | -3.88 |
| <b>Ni-btt</b>  | -5.88   | -4.90   | -6.37 | -4.47 |

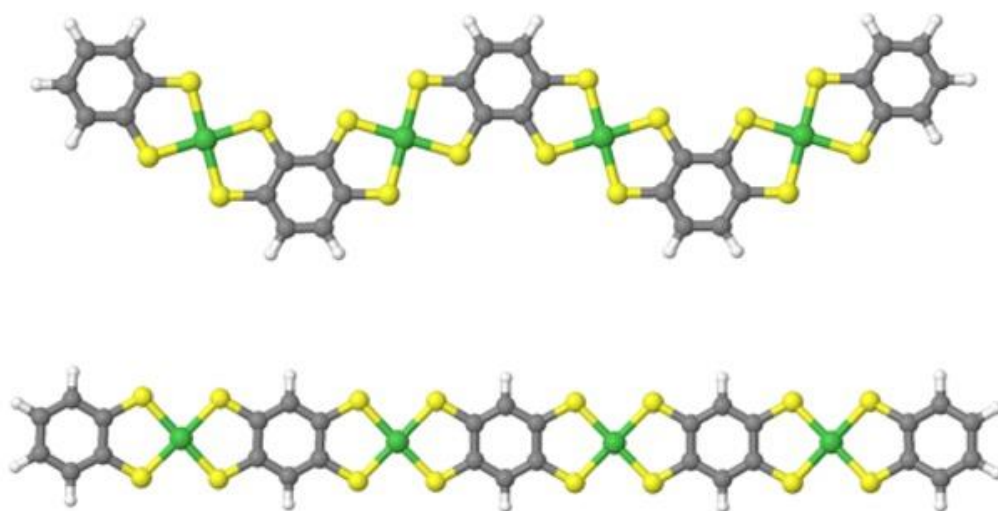

**Fig. S19** Structures of the tetramer cluster models of Ni-ibtt, top, and Ni-btt, bottom, used in the cluster calculations.

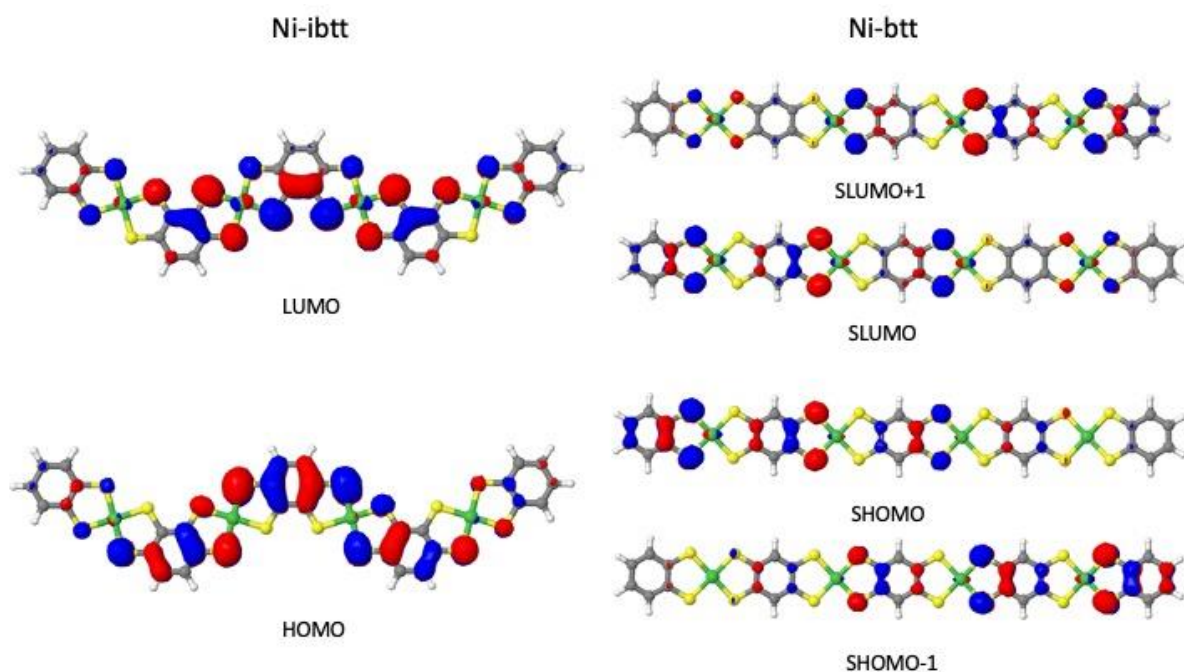

**Figure S20.** Frontier orbitals for the electronic ground state of **Ni-ibtt**, left, and **Ni-btt**, right. In the case of **Ni-btt** two occupied and two unoccupied orbitals are shown because the open-shell singlet ground state of **Ni-btt** is calculated with unrestricted DFT and thus spin-polarised molecular orbitals with one electron per orbital and not two as in the restricted calculations for closed-shell **Ni-ibtt**.

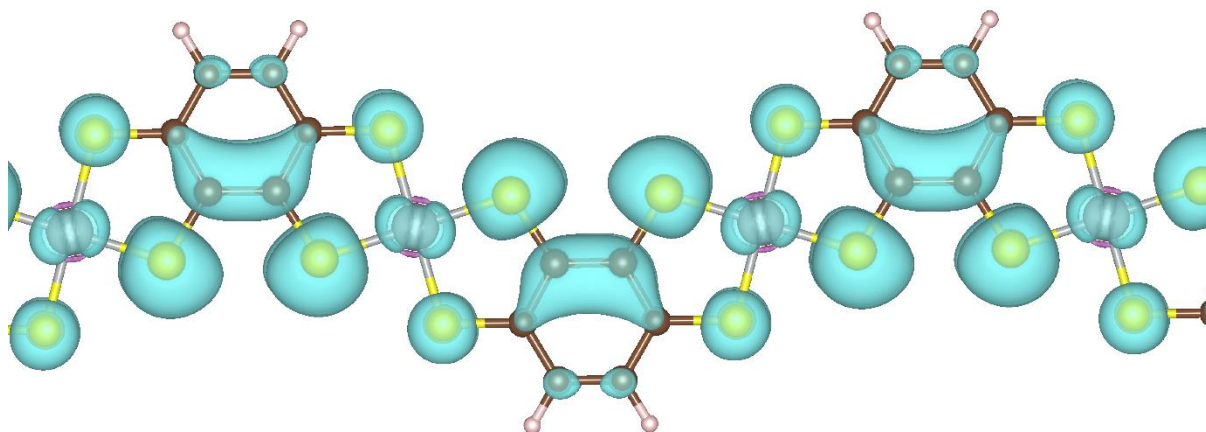

**Figure S21.** Partial charge density of the conduction band minimum ( $\Gamma$ ) of 100%-trans **Ni-ibtt**, shown at an isosurface level of  $6 \times 10^{-4} \text{ e } \text{\AA}^3$ .

## Thermoelectric characterisation

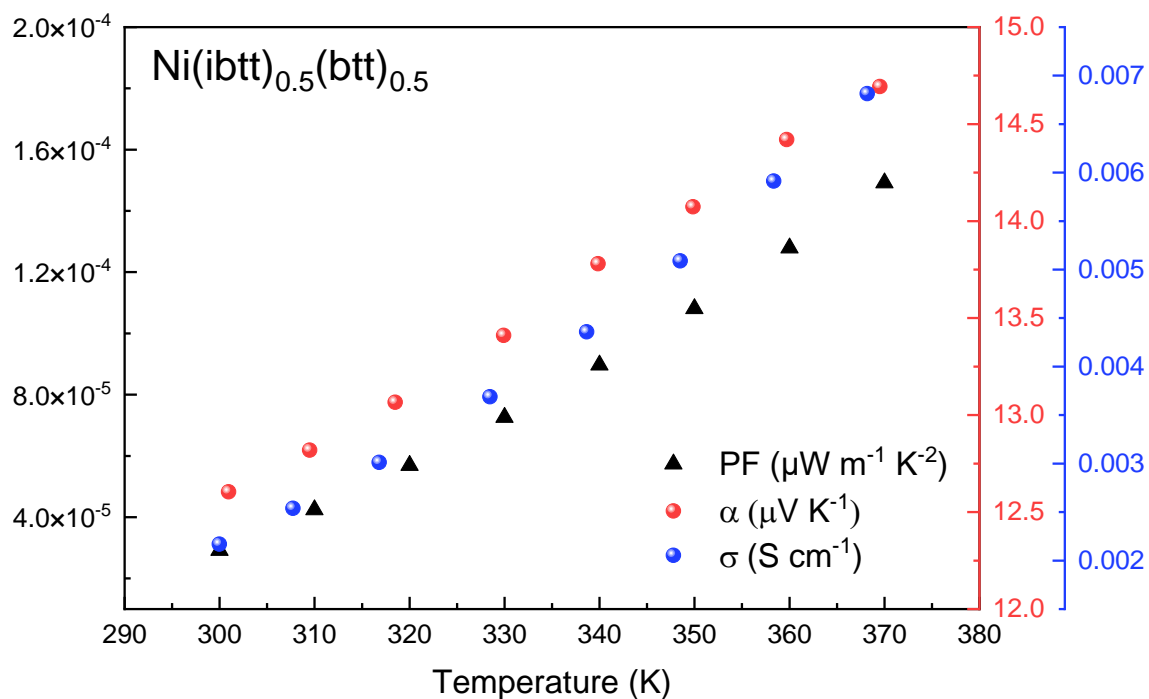

**Figure S22.** Thermoelectric properties of  $\text{Ni}(\text{ibtt})_{0.5}(\text{btt})_{0.5}$ , electrical conductivities (blue dots), Seebeck coefficients (red dots) and the power factor (black triangles).

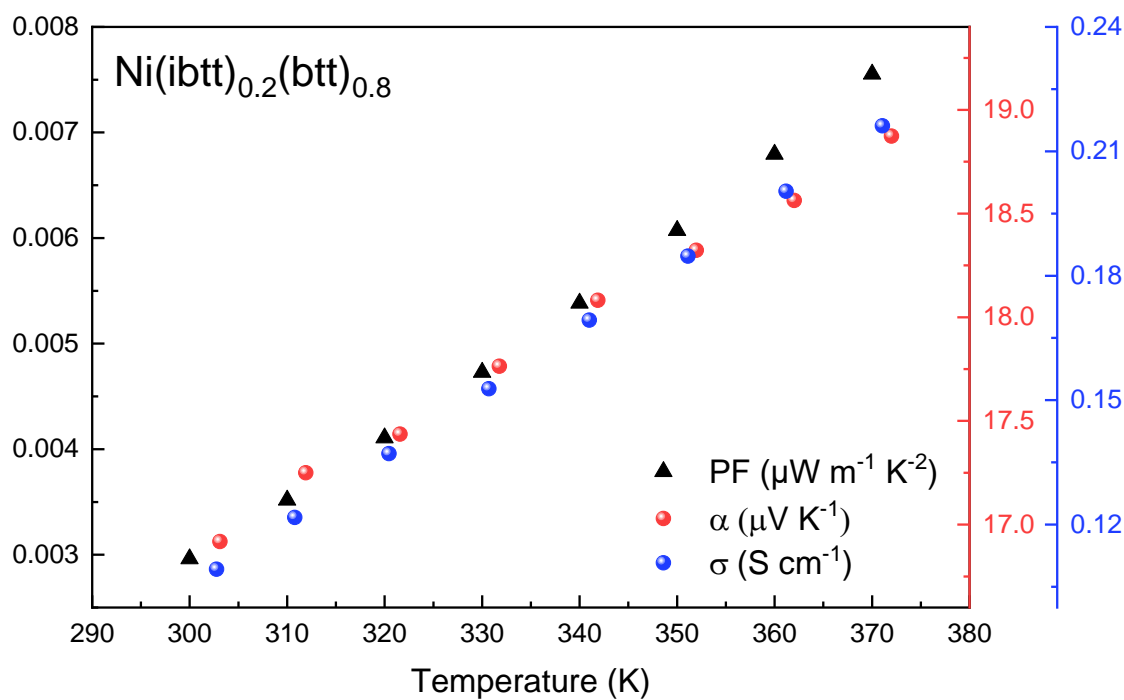

**Figure S23.** Thermoelectric properties of  $\text{Ni}(\text{ibtt})_{0.2}(\text{btt})_{0.8}$ , electrical conductivities (blue dots), Seebeck coefficients (red dots) and the power factor (black triangles).

## References

1. Becke, A.D. Density-functional thermochemistry. III. The role of exact exchange. *The Journal of Chemical Physics* **98**, 5648-5652 (1993).
2. Lee, C., Yang, W. & Parr, R.G. Development of the Colle-Salvetti correlation-energy formula into a functional of the electron density. *Phys Rev B Condens Matter* **37**, 785-789 (1988).
3. Vosko, S.H., Wilk, L. & Nusair, M. Accurate spin-dependent electron liquid correlation energies for local spin density calculations: a critical analysis. *Canadian Journal of Physics* **58**, 1200-1211 (1980).
4. Stephens, P.J., Devlin, F.J., Chabalowski, C.F. & Frisch, M.J. Ab Initio Calculation of Vibrational Absorption and Circular Dichroism Spectra Using Density Functional Force Fields. *The Journal of Physical Chemistry* **98**, 11623-11627 (1994).
5. Grimme, S., Antony, J., Ehrlich, S. & Krieg, H. A consistent and accurate ab initio parametrization of density functional dispersion correction (DFT-D) for the 94 elements H-Pu. *J Chem Phys* **132**, 154104 (2010).
6. Weigend, F. & Ahlrichs, R. Balanced basis sets of split valence, triple zeta valence and quadruple zeta valence quality for H to Rn: Design and assessment of accuracy. *Physical Chemistry Chemical Physics* **7**, 3297-3305 (2005).
7. Furche, F. et al. Turbomole. *WIREs Computational Molecular Science* **4**, 91-100 (2014).
8. Balasubramani, S.G. et al. TURBOMOLE: Modular program suite for ab initio quantum-chemical and condensed-matter simulations. *The Journal of Chemical Physics* **152** (2020).
9. Kresse, G. & Hafner, J. Ab initio molecular dynamics for liquid metals. *Physical Review B* **47**, 558-561 (1993).
10. Kresse, G. & Hafner, J. Ab initio molecular-dynamics simulation of the liquid-metal--amorphous-semiconductor transition in germanium. *Physical Review B* **49**, 14251-14269 (1994).
11. Kresse, G. & Furthmüller, J. Efficiency of ab-initio total energy calculations for metals and semiconductors using a plane-wave basis set. *Computational Materials Science* **6**, 15-50 (1996).
12. Kresse, G. & Furthmüller, J. Efficient iterative schemes for ab initio total-energy calculations using a plane-wave basis set. *Physical Review B* **54**, 11169-11186 (1996).
13. Blöchl, P.E. Projector augmented-wave method. *Physical Review B* **50**, 17953-17979 (1994).
14. Liu, Z. et al. Controlling the Thermoelectric Properties of Organometallic Coordination Polymers via Ligand Design. *Advanced Functional Materials* **30**, 2003106 (2020).
15. Heyd, J., Scuseria, G.E. & Ernzerhof, M. Hybrid functionals based on a screened Coulomb potential. *The Journal of Chemical Physics* **118**, 8207-8215 (2003).
16. Janesko, B.G., Henderson, T.M. & Scuseria, G.E. Screened hybrid density functionals for solid-state chemistry and physics. *Phys Chem Chem Phys* **11**, 443-454 (2009).
17. M Ganose, A., J Jackson, A. & O Scanlon, D. sumo: Command-line tools for plotting and analysis of periodic ab initio calculations. *J. Open Source Softw.* **3**, 717 (2018).
18. Bradley, C. & Cracknell, A.P. The mathematical theory of symmetry in solids. (Oxford University Press, London, England; 2009).
19. D. Whalley, L. effmass: An effective mass package. *J. Open Source Softw.* **3**, 797 (2018).
